# Supplementary material for: Composites of Quasi-Colloidal Layered Double Hydroxide Nanoparticles and Agarose Hydrogels for Chromate Removal
Source: PubMed Central journal article supplement (PMC5302482; doi:10.3390/nano6020025), 2016-01-26

## Supplementary Materials

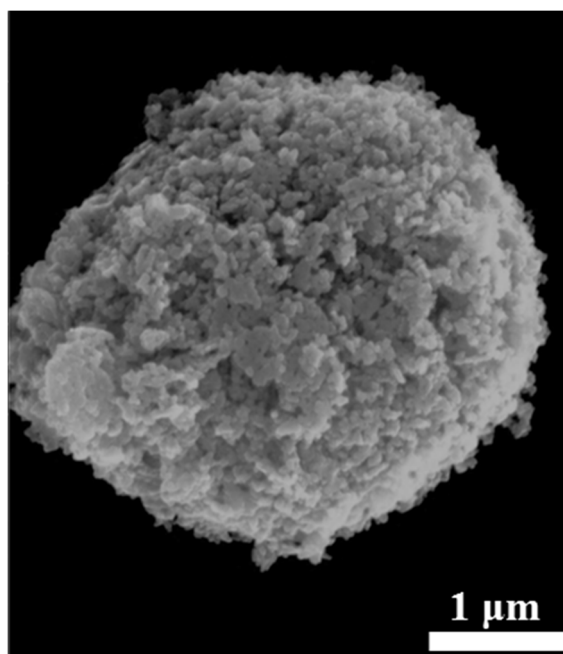

**Figure S1.** Scanning electron microscopic (SEM) image of Layered double hydroxide (LDH) nanoparticles in powder form.

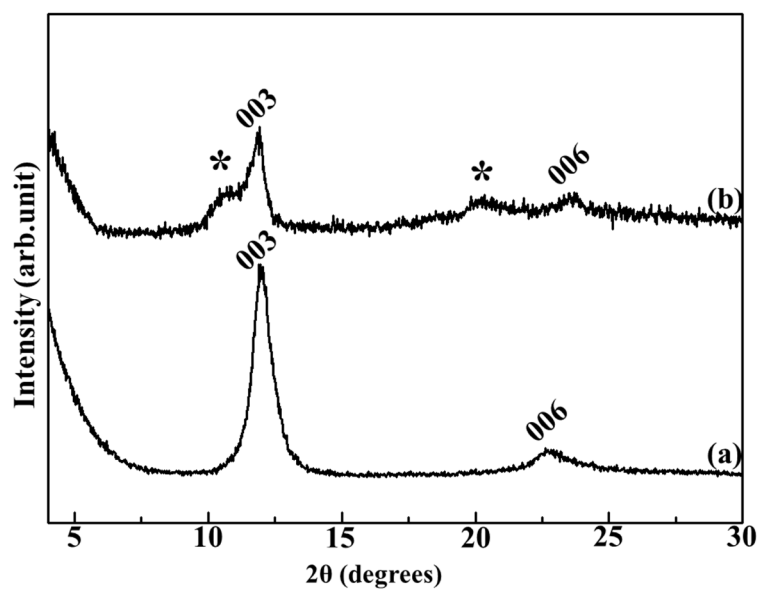

**Figure S2.** X-ray diffraction pattern of MgAl-CO<sub>3</sub>-LDH (a) before and (b) after treated in chromate solution (1200 ppm). Asterisks (\*) stand for the peak from LDH partially intercalated by chromate.

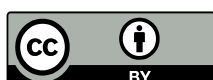

Supplement: nanomaterials-06-00025-s001.pdf [file nanomaterials-06-00025-s001.pdf]
